# Supplementary material for: Activity coefficients of lanthanum salts at 298.15 KElectronic Supplementary Information available. See http://www.rsc.org/suppdata/cp/b1/b108053a/
Source: Royal Society of Chemistry journal article supplement (doi:10.1039/b108053a), 2001-12-13
Supplement: Supinfor.doc [file Supinfor.doc]

# ELECTRONIC Supplementary Information to:

# Activity Coefficients of Lanthanum Salts at 298.15 K

*by Francesco Malatesta,* † Franco Bruni,† and Nicolangelo Fanelli.‡*

* To whom correspondence should be addressed; E-mail [*franco@dcci.unipi.it*](mailto:franco@dcci.unipi.it) (Francesco Malatesta). † Dipartimento di Chimica e Chimica Industriale dell'Università di Pisa, Via Risorgimento 35, 56126 Pisa, Italy. ‡ ICAS - Area di Ricerca CNR, Via Moruzzi 1 - 56100 Pisa - Italy

**Table S1** **-** Experimental Emf and Activity Coefficients of La(ClO4)3

| *Series* | *m /mol kg-1* | *E /mV* | | *Eref /mV* | | *ln ±dir a* | | *ln ±b* | |
| --- | --- | --- | --- | --- | --- | --- | --- | --- | --- |
| 1 | 1.002×10-3 | -45.35 | ±0.01 | -45.35 | ±0.01 | *-0.225* | *(ref.)* | -0.225 | ±0.006 |
| 1 | 3.000×10-2 | 52.79 | ±0.01 | -45.32 | ±0.03 | -0.760 | ±0.001 | -0.756 | ±0.006 |
| 1 | 1.923×10-2 | 40.60 | ±0.01 | -45.29 | ±0.06 | -0.672 | ±0.002 | -0.669 | ±0.006 |
| 1 | 1.218×10-2 | 27.82 | ±0.01 | -45.26 | ±0.03 | -0.589 | ±0.001 | -0.587 | ±0.006 |
| 1 | 1.002×10-3 | -45.23 | ±0.01 |  |  |  |  |  |  |
| 1' | 7.809×10-3 | 15.26 | ±0.01 | -45.21 | ±0.02 | -0.513 | ±0.001 | -0.512 | ±0.006 |
| 1' | 4.995×10-3 | 2.42 | ±0.01 | -45.20 | ±0.02 | -0.442 | ±0.001 | -0.441 | ±0.006 |
| 1' | 1.002×10-3 | -45.18 | ±0.01 |  |  |  |  |  |  |
| 2 | 1.002×10-3 | -45.20 | ±0.01 |  |  |  |  |  |  |
| 2 | 3.149×10-3 | -11.20 | ±0.01 | -45.44 | ±0.24 | -0.371 | ±0.007 | -0.370 | ±0.009 |
| 2 | 2.144×10-3 | -22.79 | ±0.01 | -45.68 | ±0.48 | -0.318 | ±0.014 | -0.317 | ±0.015 |
| 2 | 1.496×10-3 | -33.90 | ±0.01 | -45.92 | ±0.48 | -0.275 | ±0.014 | -0.274 | ±0.015 |
| 2 | 9.462×10-4 | -48.24 | ±0.01 | -46.16 | ±0.24 | -0.228 | ±0.008 | -0.228 | ±0.009 |
| 2 | 1.002×10-3 | -46.40 | ±0.02 |  |  |  |  |  |  |
| 3 | 1.002×10-3 | -46.19 | ±0.01 |  |  |  |  |  |  |
| 3 | 6.597×10-4 | -59.35 | ±0.01 | -46.21 | ±0.02 | -0.190 | ±0.001 | -0.190 | ±0.006 |
| 3 | 4.186×10-4 | -73.65 | ±0.01 | -46.24 | ±0.05 | -0.152 | ±0.001 | -0.152 | ±0.006 |
| 3 | 2.668×10-4 | -88.13 | ±0.01 | -46.26 | ±0.02 | -0.124 | ±0.001 | -0.124 | ±0.006 |
| 3 | 1.002×10-3 | -46.29 | ±0.01 |  |  |  |  |  |  |
| 4 | 1.002×10-3 | -46.13 | ±0.01 |  |  |  |  |  |  |
| 4 | 0.6303 | 150.59 | ±0.07 | -46.22 | ±0.09 | -0.924 | ±0.003 | -0.776 | ±0.038 |
| 4 | 1.002×10-3 | -46.30 | ±0.01 |  |  |  |  |  |  |
| 4' | 0.3816 | 129.67 | ±0.01 | -46.30 | ±0.01 | -1.031 | ±0.001 | -0.961 | ±0.018 |
| 4' | 0.2134 | 109.27 | ±0.01 | -46.30 | ±0.01 | -1.045 | ±0.001 | -1.012 | ±0.010 |
| 4' | 1.002×10-3 | -46.30 | ±0.06 |  |  |  |  |  |  |
| 5 | 1.002×10-3 | -46.30 | ±0.01 |  |  |  |  |  |  |
| 5 | 0.1007 | 86.25 | ±0.02 | -46.34 | ±0.04 | -0.965 | ±0.001 | -0.951 | ±0.007 |
| 5 | 7.883×10-2 | 79.00 | ±0.01 | -46.38 | ±0.04 | -0.930 | ±0.001 | -0.919 | ±0.007 |
| 5 | 1.002×10-3 | -46.42 | ±0.01 |  |  |  |  |  |  |
| 5' | 5.973×10-2 | 71.11 | ±0.01 | -46.42 | ±0.01 | -0.882 | ±0.001 | -0.873 | ±0.006 |
| 5' | 3.522×10-2 | 56.26 | ±0.01 | -46.41 | ±0.01 | -0.787 | ±0.001 | -0.782 | ±0.006 |
| 5' | 1.002×10-3 | -46.41 | ±0.01 |  |  |  |  |  |  |
| 6 | 1.002×10-3 | -46.42 | ±0.01 |  |  |  |  |  |  |
| 6 | 0.8207 | 168.50 | ±0.50 | -46.61 | ±0.19 | -0.654 | ±0.016 | -0.426 | ±0.059 |
| 6 | 1.002×10-3 | -46.80 | ±0.05 |  |  |  |  |  |  |
| 6' | 1.010 | 181.80 | ±0.50 | -46.40 | ±0.40 | -0.479 | ±0.019 | -0.159 | ±0.082 |
| 6' | 1.002×10-3 | -46.00 | ±0.02 |  |  |  |  |  |  |
| 7 | 1.002×10-3 | -46.70 | ±0.01 |  |  |  |  |  |  |
| 7 | 0.2497 | 114.29 | ±0.01 | -46.46 | ±0.24 | -1.051 | ±0.007 | -1.011 | ±0.014 |
| 7 | 1.002×10-3 | -46.22 | ±0.01 |  |  |  |  |  |  |
| 7' | 0.1600 | 99.90 | ±0.01 | -46.52 | ±0.30 | -1.024 | ±0.009 | -1.000 | ±0.012 |
| 7' | 1.002×10-3 | -46.82 | ±0.02 |  |  |  |  |  |  |
| 8 | 1.002×10-3 | -46.89 | ±0.01 |  |  |  |  |  |  |
| 8 | 9.935×10-2 | 85.08 | ±0.01 | -46.87 | ±0.02 | -0.970 | ±0.001 | -0.956 | ±0.007 |
| 8 | 1.002×10-3 | -46.85 | ±0.02 |  |  |  |  |  |  |

*a* Quoted errors do not include uncertainty of the reference point.

*b* Corrected for *w* = 12 mol of water per mol of salt; errors include uncertainty of the reference point and of a possible error in *w* of ±3 mol of water per mol of salt.

**Table S2** **-** Experimental Emf and Activity Coefficients of La(NO3)3

| *Series* | *m /mol kg-1* | *E /mV* | | *Eref /mV* | | *ln ±dir a* | | *ln ± b* | |
| --- | --- | --- | --- | --- | --- | --- | --- | --- | --- |
| 1 | 7.495×10‑4 | 1.53 | ±0.03 |  |  | *-0.222* | *(ref.)* | -0.222 | ±0.006 |
| 1 | 1.375×10‑2 | 84.01 | ±0.01 | 1.52 | ±0.04 | -0.723 | ±0.001 | -0.719 | ±0.006 |
| 1 | 8.291×10‑3 | 70.59 | ±0.04 | 1.51 | ±0.05 | -0.609 | ±0.002 | -0.606 | ±0.006 |
| 1 | 4.210×10‑3 | 51.94 | ±0.02 | 1.50 | ±0.06 | -0.475 | ±0.002 | -0.474 | ±0.006 |
| 1 | 2.426×10‑3 | 36.29 | ±0.02 | 1.49 | ±0.06 | -0.381 | ±0.002 | -0.380 | ±0.006 |
| 1 | 1.268×10‑3 | 17.20 | ±0.02 | 1.48 | ±0.05 | -0.289 | ±0.002 | -0.288 | ±0.006 |
| 1 | 6.976×10‑4 | -0.67 | ±0.01 | 1.47 | ±0.04 | -0.213 | ±0.001 | -0.212 | ±0.006 |
| 1 | 7.495×10‑4 | 1.46 | ±0.03 |  |  |  |  |  |  |
| 2 | 7.495×10‑4 | 1.92 | ±0.03 |  |  |  |  |  |  |
| 2 | 3.591×10‑4 | -21.11 | ±0.03 | 1.84 | ±0.04 | -0.156 | ±0.001 | -0.156 | ±0.006 |
| 2 | 1.925×10‑4 | -40.55 | ±0.02 | 1.75 | ±0.08 | -0.098 | ±0.002 | -0.097 | ±0.006 |
| 2 | 1.059×10‑4 | -59.72 | ±0.01 c | 1.67 | ±0.12 | -0.057 | ±0.004 | -0.057 | ±0.007 |
| 2 | 1.059×10‑4 | -58.60 | ±0.10 d | 1.67 | ±0.12 | -0.024 | ±0.005 | -0.024 | ±0.008 |
| 2 | 6.777×10‑5 | -74.55 | ±0.02 c | 1.58 | ±0.18 | -0.041 | ±0.005 | -0.041 | ±0.008 |
| 2 | 6.777×10‑5 | -72.60 | ±0.10 d | 1.58 | ±0.18 | 0.016 | ±0.006 | 0.016 | ±0.008 |
| 2 | 7.495×10‑4 | 1.50 | ±0.15 |  |  |  |  |  |  |
| 3 | 7.495×10‑4 | 2.01 | ±0.02 |  |  |  |  |  |  |
| 3 | 2.801×10‑2 | 102.84 | ±0.04 | 2.09 | ±0.08 | -0.902 | ±0.003 | -0.893 | ±0.007 |
| 3 | 5.692×10‑2 | 120.07 | ±0.01 | 2.17 | ±0.16 | -1.110 | ±0.005 | -1.092 | ±0.008 |
| 3 | 0.1100 | 136.00 | ±0.02 | 2.25 | ±0.24 | -1.307 | ±0.007 | -1.271 | ±0.010 |
| 3 | 0.2549 | 155.96 | ±0.02 | 2.32 | ±0.16 | -1.566 | ±0.005 | -1.485 | ±0.013 |
| 3 | 0.5762 | 175.16 | ±0.02 | 2.40 | ±0.08 | -1.824 | ±0.002 | -1.625 | ±0.025 |
| 3 | 7.495×10‑4 | 2.48 | ±0.04 |  |  |  |  |  |  |
| 4 | 7.495×10‑4 | 1.97 | ±0.01 |  |  |  |  |  |  |
| 4 | 3.299×10‑2 | 106.78 | ±0.01 | 1.98 | ±0.02 | -0.947 | ±0.001 | -0.936 | ±0.006 |
| 4 | 1.851×10‑2 | 92.10 | ±0.02 | 1.99 | ±0.03 | -0.798 | ±0.001 | -0.792 | ±0.006 |
| 4 | 9.383×10‑3 | 74.27 | ±0.01 | 2.00 | ±0.04 | -0.640 | ±0.001 | -0.636 | ±0.006 |
| 4 | 5.851×10‑3 | 61.55 | ±0.03 | 2.01 | ±0.04 | -0.539 | ±0.001 | -0.537 | ±0.006 |
| 4 | 3.581×10‑3 | 47.89 | ±0.02 | 2.03 | ±0.03 | -0.447 | ±0.001 | -0.446 | ±0.006 |
| 4 | 2.222×10‑3 | 34.28 | ±0.03 | 2.04 | ±0.02 | -0.368 | ±0.001 | -0.367 | ±0.006 |
| 4 | 7.495×10‑4 | 2.05 | ±0.02 |  |  |  |  |  |  |
| 5 | 7.495×10‑4 | 2.30 | ±0.01 |  |  |  |  |  |  |
| 5 | 1.589×10‑3 | 24.75 | ±0.03 | 2.26 | ±0.02 | -0.317 | ±0.001 | -0.316 | ±0.006 |
| 5 | 8.824×10‑4 | 7.34 | ±0.02 | 2.23 | ±0.03 | -0.236 | ±0.001 | -0.236 | ±0.006 |
| 5 | 6.630×10‑4 | -1.45 | ±0.01 | 2.19 | ±0.04 | -0.205 | ±0.001 | -0.205 | ±0.006 |
| 5 | 4.571×10‑4 | -13.03 | ±0.03 | 2.15 | ±0.03 | -0.171 | ±0.001 | -0.171 | ±0.006 |
| 5 | 3.067×10‑4 | -25.70 | ±0.02 | 2.12 | ±0.02 | -0.140 | ±0.001 | -0.140 | ±0.006 |
| 5 | 7.495×10‑4 | 2.08 | ±0.01 |  |  |  |  |  |  |

*a* Quoted errors do not include uncertainty of the reference point.

*b* Corrected for *w* = 24 mol of water per mol of salt; errors include uncertainty of the reference point and of a possible error in *w* of ±3 mol of water per mol of salt.

*c* Measured under stirring conditions (speed of the magnetic bar, ca. 2 rps).

*d* Measured in an unstirred solution.

**Table S3** **-** Experimental Emf and Activity Coefficients of La2(SO4)3

| *Series* | *m /mol kg-1* | *E /* | *mV* | *Eref* | */mV* | *ln* | *±dir a* | *ln* | *±  b* |
| --- | --- | --- | --- | --- | --- | --- | --- | --- | --- |
| 1 | 4.929×10-4 | -59.52 | ±0.08 | -59.52 | ±0.08 | *-1.158* | *(ref.)* | -1.158 | ±0.017 |
| 1 | 2.917×10-2 | -16.42 | ±0.04 | -59.18 | ±0.34 | -3.242 | ±0.016 | -3.231 | ±0.023 |
| 1 | 1.967×10-2 | -19.61 | ±0.01 | -58.83 | ±0.68 | -3.013 | ±0.032 | -3.005 | ±0.036 |
| 1 | 1.367×10-2 | -22.82 | ±0.10 | -58.49 | ±0.68 | -2.815 | ±0.032 | -2.809 | ±0.036 |
| 1 | 9.168×10-3 | -26.47 | ±0.07 | -58.15 | ±0.34 | -2.602 | ±0.016 | -2.598 | ±0.023 |
| 1 | 4.929×10-4 | -57.81 | ±0.10 |  |  |  |  |  |  |
| 2 | 4.929×10-4 | -59.70 | ±0.06 |  |  |  |  |  |  |
| 2 | 5.868×10-3 | -31.04 | ±0.03 | -59.63 | ±0.07 | -2.300 | ±0.004 | -2.297 | ±0.016 |
| 2 | 4.398×10-3 | -34.07 | ±0.04 | -59.56 | ±0.15 | -2.156 | ±0.007 | -2.154 | ±0.017 |
| 2 | 3.142×10-3 | -37.90 | ±0.11 | -59.48 | ±0.07 | -2.002 | ±0.006 | -2.001 | ±0.017 |
| 2 | 4.929×10-4 | -59.41 | ±0.07 |  |  |  |  |  |  |
| 3 | 4.929×10-4 | -58.66 | ±0.08 |  |  |  |  |  |  |
| 3 | 2.313×10-3 | -41.16 | ±0.07 | -58.82 | ±0.16 | -1.879 | ±0.008 | -1.878 | ±0.018 |
| 3 | 1.513×10-3 | -45.87 | ±0.10 | -58.98 | ±0.32 | -1.668 | ±0.016 | -1.667 | ±0.022 |
| 3 | 9.512×10-4 | -51.15 | ±0.07 | -59.13 | ±0.16 | -1.443 | ±0.008 | -1.442 | ±0.018 |
| 3 | 4.929×10-4 | -59.29 | ±0.08 |  |  |  |  |  |  |
| 4 | 4.929×10-4 | -59.76 | ±0.06 |  |  |  |  |  |  |
| 4 | 6.706×10-4 | -55.98 | ±0.04 | -59.80 | ±0.04 | -1.287 | ±0.003 | -1.287 | ±0.016 |
| 4 | 5.070×10-4 | -59.43 | ±0.07 | -59.85 | ±0.09 | -1.167 | ±0.005 | -1.166 | ±0.017 |
| 4 | 3.704×10-4 | -63.59 | ±0.04 | -59.89 | ±0.09 | -1.045 | ±0.005 | -1.045 | ±0.017 |
| 4 | 2.729×10-4 | -67.72 | ±0.06 | -59.94 | ±0.04 | -0.931 | ±0.003 | -0.930 | ±0.016 |
| 4 | 4.929×10-4 | -59.98 | ±0.01 |  |  |  |  |  |  |
| 5 | 4.929×10-4 | -59.96 | ±0.03 |  |  |  |  |  |  |
| 5 | 1.929×10-4 | -72.47 | ±0.03 | -59.98 | ±0.02 | -0.803 | ±0.002 | -0.803 | ±0.016 |
| 5 | 1.386×10-4 | -77.26 | ±0.02 | -59.99 | ±0.03 | -0.696 | ±0.002 | -0.696 | ±0.016 |
| 5 | 9.990×10-5 | -82.02 | ±0.03 | -60.01 | ±0.03 | -0.590 | ±0.002 | -0.590 | ±0.016 |
| 5 | 7.022×10-5 | -87.39 | ±0.02 | -60.02 | ±0.02 | -0.488 | ±0.001 | -0.487 | ±0.016 |
| 5 | 4.929×10-4 | -60.04 | ±0.01 |  |  |  |  |  |  |
| 6 | 4.929×10-4 | -60.00 | ±0.01 |  |  |  |  |  |  |
| 6 | 5.424×10-5 | -91.63 | *c* | -59.93 | ±0.07 | -0.432 | ±? | -0.432 | ±? |
| 6 | 5.424×10-5 | -91.88 | *d* | -59.93 | ±0.07 | -0.443 | ±? | -0.443 | ±? |
| 6 | 5.424×10-5 | -91.49 | *e* | -59.93 | ±0.07 | -0.425 | ±? | -0.425 | ±? |
| 6 | 4.929×10-4 | -59.87 | ±0.02 |  |  |  |  |  |  |
| 7 | 4.929×10-4 | -59.60 | ±0.03 |  |  |  |  |  |  |
| 7 | 1.392×10-3 | -46.87 | ±0.06 | -59.25 | ±0.35 | -1.618 | ±0.017 | -1.617 | ±0.023 |
| 7 | 3.875×10-3 | -35.31 | ±0.02 | -58.90 | ±0.70 | -2.118 | ±0.033 | -2.117 | ±0.037 |
| 7 | 1.079×10-2 | -25.08 | ±0.02 | -58.54 | ±0.70 | -2.681 | ±0.033 | -2.677 | ±0.036 |
| 7 | 2.917×10-2 | -16.12 | ±0.04 | -58.19 | ±0.35 | -3.274 | ±0.017 | -3.263 | ±0.023 |
| 7 | 4.929×10-4 | -57.84 | ±0.06 |  |  |  |  |  |  |

*a* Quoted errors do not include uncertainty of the reference point.

*b* Corrected for *w* = 48 mol of water per mol of salt; errors include uncertainty of the reference point and of a possible error of *w* of ±3 mol of water per mol of salt.

*c*Measured under stirring conditions (speed of magnetic bar, ca. 2 rps).

*d*Measured under stirring conditions (speed of magnetic bar, ca. 6-8 rps).

*e* Measured in an unstirred solution.

**Table S4** **-** Determination of E* and ln ±(ref) for La2(SO4)3 using the Absolute Point Method *a*

| **Salt** | | **K2SO4** | **KCl** | **LaCl3** | **La2(SO4)3** | **La2(SO4)3** |
| --- | --- | --- | --- | --- | --- | --- |
| ***m*** | | 1.058×10-3 | 2.688×10-3 | 1.000×10-3 | 4.929×10-4 | 4.929×10-4 |
| **Run** | **ln ±** | -0.130±0.006 | -0.057±0.002 | -0.242±0.006 | — | ln ±(ref)*b* |
| 1 | E | — | -66.90 | — | -59.46 | — |
| 2 | E E* | -75.09  193.98 | (-66.67)  240.41 | -44.22  200.69 | (-59.45)  *128.27* | *-1.152* |
| 3 | E E* | (-74.78)  194.28 | -66.44  240.64 | (-44.21)  200.71 | -59.44  *128.36* | *-1.157* |
| 4 | E E* | -74.50  194.57 | (-66.42)  240.66 | -44.19  200.73 | (-59.38)  *128.65* | *-1.167* |
| 5 | E E* | (-74.58)  194.49 | -66.40  240.68 | (-44.26)  200.65 | -59.31  *128.48* | *-1.155* |
| 6 | E | -74.65 | — | -44.34 | — | — |

*a*Bracketed values are interpolated, values in italics are calculated using Eq. (3). Owing to the low concentrations, distinctions between ± and ±dir are neglected. *b* Mean value for ln ±(ref), ‑1.158 ± 0.006 (-1.158 ± 0.016 including propagation of the errors already present in K2SO4, KCl , and LaCl3).

**Table S5 -** Experimental activity coefficients of LaCl3

| *m* | ln ±  *a* | *m* | ln ±  *a* | *m* | ln ± *a* | *m* | ln ± *a* | *m* | ln ± *a* | *m* | ln ± *b* |
| --- | --- | --- | --- | --- | --- | --- | --- | --- | --- | --- | --- |
| 0.04136 | -0.912 | 0.01524 | -0.688 | 0.003169 | -0.392 | 0.002895 | -0.386 | 0.006564 | -0.515 | 0.0006088 | -0.205 |
| 0.01427 | -0.674 | 0.005728 | -0.488 | 0.001235 | -0.273 | 0.001088 | -0.261 | 0.002267 | -0.344 | 0.001668 | -0.305 |
| 0.004948 | -0.460 | 0.002127 | -0.326 | 0.0005378 | -0.194 | 0.0003935 | -0.158 | 0.0007888 | -0.219 | 0.003228 | -0.395 |
| 0.001621 | -0.291 | 0.0008346 | -0.230 | 0.0002461 | -0.133 | 0.01160 | -0.630 | 0.0002928 | -0.144 | 0.004900 | -0.461 |
| 0.0004962 | -0.184 | 0.0003208 | -0.137 | 0.1628 | -1.198 | 0.003846 | -0.427 | 0.0002928 | -0.133 | 0.01097 | -0.611 |
| 0.04136 | -0.919 | 0.004389 | -0.440 | 0.05727 | -0.979 | 0.001310 | -0.270 |  |  | 0.01724 | -0.708 |
| 0.01427 | -0.680 | 0.001595 | -0.298 | 0.02129 | -0.755 | 0.0004732 | -0.170 | *m* | ln ± *c* | 0.02534 | -0.795 |
| 0.004948 | -0.462 | 0.0006305 | -0.202 | 0.007719 | -0.545 | 0.8755 | -1.111 | 0.03345 | -0.860 |
| 0.001621 | -0.291 | 0.0002505 | -0.124 | 0.003145 | -0.391 | 0.6156 | -1.242 | 0.03119 | -0.847 |  |  |
| 0.0004962 | -0.169 | 0.03012 | -0.840 | 0.001237 | -0.266 | 0.6156 | -1.237 | 0.02494 | -0.793 |  |  |
| 0.04136 | -0.915 | 0.01351 | -0.659 | 0.0004655 | -0.164 | 0.3842 | -1.284 | 0.01247 | -0.638 |  |  |
| 0.01407 | -0.666 | 0.006153 | -0.505 | 0.8755 | -1.105 | 0.3842 | -1.282 | 0.006234 | -0.504 |  |  |
| 0.005303 | -0.474 | 0.002480 | -0.356 | 0.4829 | -1.263 | 0.2391 | -1.251 | 0.003117 | -0.389 |  |  |
| 0.001932 | -0.320 | 0.0009918 | -0.244 | 0.1740 | -1.194 | 0.1330 | -1.151 | 0.002493 | -0.354 |  |  |
| 0.0007567 | -0.215 | 0.0003738 | -0.152 | 0.06022 | -0.982 | 0.07076 | -1.021 | 0.001248 | -0.273 |  |  |
| 0.0002712 | -0.135 | 0.01690 | -0.694 | 0.02187 | -0.768 | 0.03649 | -0.872 |  |  |  |  |
| 0.04136 | -0.921 | 0.007495 | -0.534 | 0.007906 | -0.558 | 0.01684 | -0.701 |  |  |  |  |

*a* Recalculated from the experimental data of Ref. 1(c) by introducing the correction for the ion hydration effect, *w* = 24. *b*Values from Ref. 3(a) turned from the molar into the molal concentration scale, and shifted by -0.0121. *c* Values from Ref. 3(b) shifted by ‑0.0068.

**Best-fit treatments for ln ± and  of LaCl3, La(ClO4)3 and La(NO3)3 using the Pitzer theory.**

Owing to the different characteristics of the isopiestic method, particularly precise in the concentrate regions, and of the liquid membrane cells method, especially precise in dilute solutions, it was desirable that the results of both methods were suitably collected within a single interpolating treatment, able to provide accurate calculated values of both ln ± and  for La(NO3)3, La(ClO4)3, and LaCl3, from infinite dilution up to saturated and supersaturated solutions. We selected Pitzer’s semiempirical equations,15,16 a widespread tool for the interpolation of electrolyte properties. The best fit treatment of a hybrid set of experimental values, ln ± matched with the osmotic coefficients , presents some conceptual problems, as it seems an indefinite problem like searching the "best fit" amount for manure able to maximise the green colour of grass and to minimise the smell. Fortunately the deviations |expt – calc |, , can be transformed into virtual deviations ln ±, or vice-versa, by utilizing the derivative d(ln ±)/d. The criteria used to assign appropriate weights to the experimental points are the same as those described in the Appendix 2 of Ref. 1(g) with only trivial modifications needed to include Pitzer’s 2 and (2) parameters.16 As an interesting alternative, however, it is also possible to search for the set of parameter values minimising the *product* of the sum of the squared deviations of ln ± times the sum of the squared deviations of .

The results are not fully satisfactory. The parameters shown in Table 1 suffice to calculate both ln ± and  within 0.01 units or better, but are unable to justify the much higher precision of the experimental data, in particular of the isopiestic measurements in the concentrated solutions. (Thus, for *m* > 0.5 mol kg‑1 the empirical equations of Refs. 2, 5, and 6 should be used, with no change for activity coefficients of lanthanum chloride and lanthanum perchlorate and  values, and summing ‑0.073 to the ln ± values of lanthanum nitrate.) The standard deviation decreases appreciably if ln ± and  are treated separately, reaching, e.g., ±0.003 for ln ± of La(NO3)3 and La(ClO4)3 and ±0.0016 for  of La(NO3)3. However, the parameter values that ln ± needsbetween 2×10‑4 and 0.1-1 mol kg‑1 and that  needs between 0.1 and 4-8 mol kg‑1 do not coincide. Moreover,  values need further terms to be added to the classic ones of the Pitzer theory to eliminate the oscillating trend of the residuals, calc, found in the concentrated regions.

Fuller details, deviation plots, and alternative sets of parameters are contained in the next sections.

***The “summation” method* -** Since this treatment has already been described in Ref. 1(g), only the fundamentals and different items are summarized here. The deviations of isopiestic  points from the corresponding calculated curve,  = iso - calcd, are turned into virtual deviations ln ±, multiplying them by the derivative d(ln ±)/d, whose mathematical expression is also derived from the Pitzer equation and contains the same parameters (1,2, (0),…) as ln ± and . In this way the quantity to be minimized becomes the homogeneous sum:

S(1,2, (0),…, further parameters) = i p(i)×[ d(ln ±)/d]i2 + jp(j) ×2(ln ±)j

where i and j range from 1 to the number of the isopiestic points niso or potentiometric points nemf respectively. The Pitzer parameters 1,2, (0),…etc., are the variables to be optimized; p(i) and p(j) are weighting factors. The latter are composed of the product of two terms, (1) an external weighting factor piso, or pemf, that provides the weight of each subset, isopiestic points or emf points, towards the other subset, and (2) an inner weighting factor qi or qj that weights each point towards other points pertaining to the same subset. For emf points excepting LaCl3, evaluated errors of ln ± (j) are available for every point j, and qj values are thus calculated as qj = nemf/(s2j1/j2); otherwise, the q values are all set at 1. Hence, p(j) = pemf × qj, while p(i) = piso×1 = piso (we are not aware of the different errors i of the different isopiestic points).

The critical point consists in properly selecting piso and pemf. The criterion adopted in Ref. 1(g) consisted in evaluating (by iteration to convergence) the different "level of reliability" of the two subsets from the variances of the two classes of data turned into homogeneous units, i.e.:

2emf = j (ln ±emf - ln ±calc)j2/[nemf – npar nemf /(niso + nemf)]

2iso = i [(iso - calc)d(ln ±)/d]i2/[niso – npar niso/ (niso + nemf)]

where npar is the number of adjustable parameters [unlike Ref. 1(g), the denominator of each 2 allows for the fact that the npar parameters are shared between the nemf and niso points of the two subsets]. Iteration starts from piso = pemf = 1 and recalculates step by step piso and pemf according to:

pemf = (niso+ nemf) / {2emf [(niso /2iso) + (nemf /2emf)]}

piso = (niso+ nemf) / {2iso [(niso /2iso) + (nemf /2emf)]}

up to convergence. The method is somewhat hazardous since, if the calculated curve does not suitably fit a subset, a vicious circle can arise, leading that subset to be progressively disregarded.

**Fig. S1** – Deviations from the Pitzer equation (experimental – calculated) for LaCl3 showing the dramatic increase of the errors of ×d(ln ±)/d errors (open circles) for *m* < 0.2 mol kg-1, compared with bare  (filled circles) and ln ± (diamonds). Calculations refer to the parameters of Table 1.

When applying the method to LaCl3, we found that  deviation times d(ln ±)/d increases dramatically between 0.2 and 0.1 mol kg-1 (Fig. S1), thus lowering the weight of the corresponding subset and making the entire procedure fail when trying to digest the refractory points. Therefore, osmotic coefficient values for *m* < 0.2 mol kg-1 are to be discarded if the "target" of the best-fit treatment is ln ±. Following elimination of these points, the parameter values and standard deviations take values of Table 1. The corresponding deviation plot again shows an oscillating trend as on the right side of Fig. S1, and it becomes more evident if *m*1/2 instead of log *m* is selected as abscissa (Fig. S2).

**Fig. S2** – Deviations from the Pitzer equation for LaCl3 showing the oscillating trend of  (open circles) compared with ln ± (filled circles). Calculations referring to parameters of Table 1.

It is clear that the quality of isopiestic points for LaCl3 is much better than a  value of 0.009 may suggest. Additional standard terms 2 and (2) do not improve the situation appreciably, as these parameters are mainly active in the diluted regions. In order to eliminate the oscillating trend we had to introduce three additional terms in the  equation,  = [(the Pitzer equation for ) + k3 *m*3 + k4 *m*4 + k5*m*5], i.e. (by applying the Gibbs-Duhem equation) ln ± = [(the Pitzer equation for ln ±) + (4 k3*m*3/3) + (5 k4*m*4/4) + (6 k5*m*5/5)] (Fig. S3). However, seven parameters (1, (0), (1), CMX, k3*,* k4*,* and k5) need to be handled, with no advantages with respect to the completely empirical polynomial equation proposed in Ref. 2 which also contains seven parameters.

**Fig. S3** – Deviations from the extended Pitzer equation for LaCl3 referring to parameter values of Table S9. Filled circles, ; open circles, ln ±.

**Fig. S4** – Deviations from the extended Pitzer equation for La(NO3)3 referring to parameter values of Table S9. Filled circles, ; open circles, ln ±.

Lanthanum nitrate presents a slightly different situation. Despite the very high concentrations (ca. 8.5 mol kg‑1, i.e. ca. 1.8 times the saturation limit), the isopiestic data for La(NO3)3 kept alone do not need - unlike LaCl3 - additional terms in the Pitzer equation (however, they take advantage of two further terms). Moreover, there are many more available isopiestic data than emf data. Automatically, the best fit algorithm neglects the information contained in the emf data, whose residuals assume an oscillating trend unlike the isopiestic points that are accurately fitted [() < 0.002]. The activity coefficients, if treated alone, are also reproduced accurately [(ln ±) = 0.0025] by a set of best-fit parameters (Table S6) which, however, do not coincide with the best-fit parameters for  (Table S7). No method was able to solve the problem, although different treatments were tentatively applied, e.g., introducing additional arbitrary weighting factors 1/niso and 1/nemf to the two subsets, increasing the weight of emf points to allow for the larger range of concentrations (in logarithmic units) covered, etc. Invariably, either the attempt did not work, or the moderate improvements achieved in the diluted regions (emf points) destroyed the very good level of agreement of the concentrated and supersaturated solutions (isopiestic points). Activity coefficient values tentatively corrected for *w* = 21 or *w* = 30 (instead of *w* = 24) worsened the situation. It is to be concluded that Pitzer's equation itself is unable to trace this salt from 8.5 mol kg‑1 down to infinite dilution, although it seemed able to do so, as long as the concentrated region (8.5 > *m* > 0.1 mol kg‑1) or the diluted region (1 > *m* > 2×10‑4 mol kg‑1) were considered separately. The results shown in Fig. S4 (obtained by applying a different kind of treatment, the *** method later described) utilized the entire set of adjustable parameters of the classic equation (including 2 and (2) typical for high charge electrolytes), the extended terms in *m*3 – *m*5 already introduced in the equation for LaCl3, and one more term, k6*m*6 (7 k6*m*6/6 for ln ±).

For lanthanum perchlorate the additional terms proportional to *m*3, *m*4, *m*5 in the Pitzer equation do not suffice to eliminate the oscillating trend of the residuals in the concentrated regions, and introduction of the additional term in *m*6 is necessary even for  values treated alone. However, in these regions the empiric equation of Ref. 6 is more accurate.

**Table S6**. Pitzer's equation parameters fitted to activity coefficients alone for LaCl3, La(ClO4)3, and La(NO3)3 in the concentration range covered by emf measurements *a*

| *Salt* | *1* | *2* | *(0)* | *(1)* | *(2)* | *CMX(* | *m1, m2 b* | *(ln ± )* |
| --- | --- | --- | --- | --- | --- | --- | --- | --- |
| LaCl3 | 2.11  ±0.05 | — | 0.681  ±0.027 | 5.50  ±0.07 | — | -0.120  ±0.023 | 2.4×10-4, 0.88 *c* | 0.0059 |
| La(ClO4)3 | 2.65  ±0.09 | — | 1.154  ±0.064 | 7.50  ±0.14 | — | -0.506  ±0.111 | 2.6×10-4, 0.38 *d* | 0.0027 *e* |
| La(NO3)3 | 2.66  ±0.24 | 16.5  ±2.2 | 0.817  ±0.072 | 5.01  ±0.41 | -25.3  ±6.2 | -0.465  ±0.092 | 3.0×10-4, 0.57 | 0.0025 *f* |

*a* Equations and parameter symbols from Ref. 23; CMX(/CMX(= 3. *b* *m1*, *m2*, experimental range where the parameters were fitted to ln ±. *c* referring to all values quoted in Table S5. *d* emf points lying at *m* > 0.38 mol kg-1, which were imprecise, are omitted. *e* ln ± values the equation calculates are 0.0056 units lower than those of Table S1;  = 0.0027 refers to values quoted in Table S1 decreased by 0.0056. *f* Calculated values are 0.015 units lower than those of Table S2;  value refers to the values of Table S2 decreased by 0.015.

**Table S7**. Pitzer's equation parameters and additional parameters fitted to osmotic coefficients alone for LaCl3 (Ref. 2), La(ClO4)3 (Ref. 6), and La(NO3)3 (Ref. 5) in the concentration range covered by isopiestic measurements *a*

| *Salt* | *1* | *(0)* | *(1)* | *CMX()*b | *k3* | *k4* | *k5* | *k6* | *m1, m2**c* | ***d* |
| --- | --- | --- | --- | --- | --- | --- | --- | --- | --- | --- |
| LaCl3 | 1.742 | 0.607 | 3.97 | -0.1083 | 0.10287 | -0.029842 | 0.002876 | — | 0.23, 3.89 | 0.0019 |
| La(ClO4)3 | 1.861 | 0.939 | 4.44 | -0.3636 | 0.54347 | -0.205246 | 0.035051 | -0.0022537 | 0.28, 4.78 | 0.0020 |
| La(NO3)3 | 1.2 | 0.283 | 2.61 | -0.0261 | 0.003606 | -0.000121 | — | — | 0.39, 8.46 | 0.0016 |

*a* Extended equation for  = [(classic equation for ) + (*k3 m*3 + *k4 m*4 + *k5 m*5 + *k6 m*6)]. *b* 3CMX() = 2CMX(). *c* *m1*, *m2*, the experimental range where the parameters were fitted to . *d* Standard deviation of  between *m1* and *m2*.

***The “product” method* -** Many of the weighting problems the *“summation”* method presents are bypassed if, instead of transforming 2 into virtual 2ln ± and then summing all the points available, one calculates the product:

**(1,2, (0),…CMX,[…]) = {i qi 2i} × {jqj 2(ln ±)j}

then searching for parameter values that minimize **. Here qi and qj, if used, have only a local effect, since a constant multiplier does not affect the position of the minimum. By minimizing **, one prevents the best fit algorithm by neglecting one subset (i.e., leaving the corresponding squared deviations to increase appreciably, e.g. ten times, to obtain minor lessening, e.g. 0.1%, in the other subset) even if the numbers of the experimental points are very different, or if the points of a subset lie in concentration regions which are more difficult to reproduce by the equation. The product minimizes the area of a rectangle whose sides are S = iqi 2i and S = jqj 2(ln ±)j respectively. The length of each side cannot decrease indefinitely but only down to S° and S°, i.e. the values pertaining to the two subsets when treated alone. Thus, it is impossible to reach a true minimum area by allowing only for the information from a single subset, i.e. building a rectangle having sides S = S° and S >> S° or vice versa, not fulfilling the condition S × S= the minimum.

**Table S8**. Pitzer's extended equation parameters for LaCl3, La(ClO4)3, and La(NO3)3 in the whole experimental range.*a, b, c*

|  | LaCl3 | La(ClO4)3 | La(NO3)3 |
| --- | --- | --- | --- |
| *1* | 2.11720 | 2.66899 | 1.66313 |
| ** | — | — | 18.4663 |
| *(0)* | 0.704325 | 1.161171 | 0.455022 |
| *(1)* | 5.44128 | 7.67851 | 3.65268 |
| *(2)* | — | — | -8.56263 |
| *CMX()* | -0.21182 | -0.65997 | -0.14495 |
| *k3* | 0.190990 | 0.866093 | 0.073588 |
| *k4* | -0.049611 | -0.306386 | -0.012278 |
| *k5* | 0.0045497 | 0.0506726 | 1.05584×10-3 |
| *k6* | — | ‑3.20058×10-3 | ‑3.6285×10-5 |
| *m1 (±)*  *m2 (±)* | 2.4×10-4  0.88 | 2.6×10-4  0.38 | 3.0×10-4  0.57 |
| *(ln ±)* | 6.0×10-3 | 4.8×10-3 | 6.4×10-3 |
| *m1 ()*  *m2 ()* | 0.233  3.89 | 0.284  4.78 | 0.398  8.46 |
| *()* | 2.3×10-3 | 3.0×10-3 | 2.2×10-3 |

*a* Extended equation for  = [(classic equation for ) + (*k3 m*3 + *k4 m*4 + *k5 m*5 + *k6 m*6)]. *b* Extended equation for ln ± = {( classic equation for ln ±) + [(4 *k3 m*3/3) + (5 *k4 m*4/4) + (6 *k5 m*5/5) + (7 *k6 m*6/6)]}. *b*  values apply in the *m1, m2* range.

Analytical standard calculations cannot unfortunately be applied in searching for the parameter values that minimize**. Our calculations used a computer program that, starting from a set of tentative values for the parameters, modifies the parameter values progressively so as to make ** lessen (of course it is also possible for a local minimum rather than the true minimum to be reached) [L. Meites, *The General Linear Regression Program CFT4A*, 22 Circle Drive, Potsdam, New York, 13676, USA, 1983]. Other calculations were all made using the algorithms of the computer program Mathematica [S. Wolfram, *The Mathematica Book*, 4nd edn. (Cambridge University Press, Cambridge, 1999)].

The method of the product, when applied to LaCl3 provides practically the same results as the other method. Improved results - a lower value of (ln ±) with no perceptible growth of  - were obtained for La(ClO4)3 and La(NO3)3. Parameter values that apply from infinite dilution up to saturated and supersaturated solutions are reported in Table S8. The ** method is the same as searching for the minimum of (ln)or ln.We believe the *product method* could usefully be applied also in other fields, e.g. to connect potentiometric and spectrophotometric information when studying equilibrium constants, kinetic constants, etc., and in all other cases where several sets of different sizes, precision, range of application of the parameters, etc., are involved. Volumes or hyper volumes, rather than surfaces, are to be minimized if three or more subsets are involved. To our knowledge, no other people have devised and used such a method.

***The modified product method* –** No standard methods apply to **. Let us now consider the sum of two surfaces, S°S + S°S (*** for brevity) equivalent to (niso - npar)j[(ln ±expt - ln ±calc)]j2 + (nemf - npar)lni(expt - calc)i2, where and ln are the standard deviations of  and ln ± when treated separately. Standard best-fit computer programs for weighted squared deviation sums s ws s2 apply to *** if the latter is treated as a single sum, where (nemf - npar)(ln)2 = wi for every i = (expt - calc)i and (niso - npar)()2 = wj for every j = (ln ±expt - ln ±calc)j. [Alternatively, wi = (niso - npar)) and wj = (nemf - npar)(ln.] Thus, best fit calculations for *** are much easier than for **.

The*** method is the same as searching for the minimum of (ln)+ (ln) or S/S° + S/S° or (ln/ln)+ (/). Table S9 (obtained using ***) yields parameter values alternative to Table S8. (Tables S6 and S7 are however preferable for better reproduction of activity coefficients alone or osmotic coefficients alone in the concentration ranges where these quantities were respectively submitted to the best-fit treatment).

**Fig. S5** – Deviations from the extended Pitzer equation for La(ClO4)3 referring to parameter values of Table S9. Filled circles, ; open circles, ln ±.

**Table S9**. Pitzer's equation parameters and additional parameters fitted to activity and osmotic coefficients for LaCl3, La(ClO4)3, and La(NO3)3 using the modified product method. *a*

|  | LaCl3 | La(ClO4)3 | La(NO3)3 |
| --- | --- | --- | --- |
| *1* | 2.14504 | 2.69445 | 1.76554 |
| ** | — | — | 16.7159 |
| *(0)* | 0.720652 | 1.16744 | 0.48856 |
| *(1)* | 5.47209 | 7.75386 | 3.83424 |
| *(2)* | — | — | -8.63374 |
| *CMX()* | -0.230957 | -0.669566 | -0.172676 |
| *k3* | 0.207772 | 0.878252 | 0.091937 |
| *k4* | -0.053343 | -0.310546 | -0.015722 |
| *k5* | 0.0048562 | 0.0513585 | 1.37119×10-3 |
| *k6* | — | ‑3.24432×10-3 | -4.7533×10-5 |
| *m1 (±)*  *m2 (±)* | 2.4×10-4  0.88 | 2.6×10-4  0.38 | 3.0×10-4  0.57 |
| *(ln ±)* | 6.1×10-3 | 4.6×10-3 | 5.9×10-3 |
| *m1 ()*  *m2 ()* | 0.233  3.89 | 0.284  4.78 | 0.398  8.46 |
| *()* | 2.1×10-3 | 3.2×10-3 | 2.6×10-3 |

*a* Symbols as in Table S8.
